# Supplementary material for: Hand grip strength is inversely associated with total daily insulin dose requirement in patients with type 2 diabetes mellitus: a cross-sectional study
Source: PeerJ. 2023 Jul 20;11:e15761. doi: 10.7717/peerj.15761 (PMC10363338; doi:10.7717/peerj.15761)
Supplement: Supplemental Information 1 [file peerj-11-15761-s001.xlsx]

## Sheet: RAW DATA
Number	Duration	HGSgroup	HGS	TDD	sex	age	SBP	DBP	ALT	AST	Cr	eGFR	HbA1c	CHOL	TG	HDL	LDL	glucose	Insulin	Height	Weight	BMI	leftHGS	RightHGS	gaitspeed	BMFR	SMFR	SMI	HomaB	HomaIR	WHR	MBG	preBreakfast	postBreakfast	preLunch	postLunch	preDinner	postDinner	prebedtime
1	8	1	15.95	0.519912	2	62	128	84	24	21	57.9	95.4563	9.1	5.05	0.71	1.67	2.27	7.26	5.1	158	45.2	18.1061	15.9	16	1.14	2.25564	1.26316	4.9	27.1277	1.6456	0.825581	8.45	4.7	7	10.4	10.5	9.4	8.7	#NULL!
10	1	1	17.5	0.721088	2	62	115	73	31	17	57.6	95.4563	8.4	5.29	1.43	1.54	3.3	12.79	21.08	153	58.8	25.1185	17	18	1.12	1.28112	0.722892	5.5	45.3821	11.9828	0.835052	8.33333	6.1	10.9	7.4	7	11.3	#NULL!	7.3
3	22	1	23.45	1.09325	1	50	120	80	33.7	22.6	63	109.398	12.4	5.89	1.36	1.48	3.6	6.4	12.4	165	62.2	22.8466	21.9	25	1.29	2.64024	1.51829	6.6	85.5172	3.52711	0.93617	8.78571	4.8	12.3	10.7	7.3	7	10.8	8.6
4	0	1	15.8	0.527473	2	43	118	82	10.7	15.1	62.9	104.648	11.3	7.42	2.15	1.4	5.61	9.6	8.39	163	72.8	27.4004	15	16.6	1.28	1.98718	1.13675	7.5	27.5082	3.57973	0.918367	6.08571	4.2	8	6.7	5.9	6.4	4.7	6.7
5	0.06	1	15.85	0.641924	2	65	120	80	9	10	42.6	103.27	13.7	5.67	1.49	1.37	2.44	14.56	5.9	154	58.2	24.5404	16.6	15.1	1.2	1.66667	0.942857	6	10.6691	3.81796	#NULL!	8.81571	6.31	9.49	7.18	7.66	7.38	15.14	8.55
6	0	1	15.95	0.891344	2	55	130	70	39	25	53	102.943	12.6	3.47	1.27	1.41	1.17	7.58	4	156	54.3	22.3126	15.4	16.5	1.01	2.12575	1.1976	6.1	19.6078	1.34756	0.909091	8.37143	7.5	10	7.8	9.3	9	8.5	6.5
7	1	1	16.4	0.686308	2	64	132	80	23	17	50.8	98.2808	13.1	5.7	1.62	1.49	3.41	10.77	15.2	156	57.7	23.7097	16.3	16.5	1.2	1.51131	0.859729	5.7	41.8157	7.27573	0.93617	6.63333	4.1	6.9	5.5	9.4	8.7	#NULL!	5.2
8	0	1	16.7	0.83066	2	67	140	70	14	14	36	107.49	10.7	3.24	1.99	1.14	1.31	7.68	4.6	154	56.1	23.6549	16.4	17	1.39	1.97238	1.10497	6.1	22.0096	1.57013	0.9	7.61429	6	8.4	9	9.5	5.5	8	6.9
11	1	1	17.5	0.687075	2	62	115	73	31	17	57.6	95.4563	8.4	5.29	1.43	1.54	3.3	12.79	21.08	153	58.8	25.1185	17	18	1.12	1.28112	0.722892	5.5	45.3821	11.9828	0.835052	9.3	6.1	10.9	7.4	7	11.3	15.1	7.3
30	0.2	1	20.35	0.406677	2	54	140	100	29	15	49.9	106.049	7.5	3.89	1.29	1.17	1.7	6.62	14.1	158	65.9	26.398	20.5	20.2	1.43	1.38722	0.789474	6.3	90.3846	4.14853	0.955556	7.82857	5.4	8.5	5.7	11.8	7.9	6.9	8.6
63	6	2	24.7	0.5722	1	41	120	76	26	13	74.6	108.756	8.9	2.34	3.82	0.49	1.13	4.28	12.71	172	74.1	25.0473	21.5	27.9	1.32	3.88966	2.32414	8.4	325.897	2.41772	0.957447	9.41429	6	10.4	10.8	12.1	9.2	9.2	8.2
12	0.1	1	17.6	0.845902	2	56	130	90	66	60	49	104.92	11.7	7.32	3.16	0.86	5.11	8.84	6.8	158	61	24.4352	15.4	19.8	1.2	1.65611	0.932127	6.1	25.4682	2.67164	1.01042	7.42857	4.2	12	5.9	7.7	7.4	7.2	7.6
13	12	1	17.7	0.941399	2	67	150	96	19	14	67.3	81.4296	9.4	4.65	2.36	1.26	1.88	9.21	5.1	160	52.9	20.6641	15.6	19.8	1.19	2.2987	1.30519	6	17.8634	2.0876	0.941176	8.95714	7.2	9.2	12.4	10.1	6.8	7.4	9.6
14	12	1	17.9	0.595448	2	52	150	82	#NULL!	#NULL!	#NULL!	#NULL!	11.3	5.84	1.45	1.55	2.12	13.45	4	160	65.9	25.7422	18.9	16.9	1.15	1.67511	0.953586	6.8	8.0402	2.39111	0.978723	8.20429	6.86	8.24	8.06	9.09	7.88	8.64	8.66
68	1	2	26.25	0.420575	2	50	120	70	52	32	50.1	108.437	8.3	4.05	1.47	1.18	1.75	8.53	5.1	162	66.1	25.1867	25.6	26.9	1.11	1.98592	1.15493	7	20.2783	1.93347	0.911111	7.58333	7.1	12.1	3.9	5.7	10.7	6	#NULL!
16	12	1	18.4	0.480427	2	62	130	77	25	26	40.6	106.956	9.5	4.8	1.18	0.99	3.33	11.75	8.42	150	56.2	24.9778	18.5	18.3	1.16	1.84211	1.04737	6.3	20.4121	4.39711	0.9375	8.4	8.4	10.8	9.9	7.6	7.8	6.5	7.8
17	10	1	18.8	0.651877	2	50	120	80	34	20	47.7	110.384	9.2	4.14	1.17	1.54	1.84	6.01	10.8	158	58.6	23.4738	17.6	20	1.35	2.30588	1.32941	6.8	86.0558	2.8848	0.977778	9.25	6.2	10.5	7	7.5	10.2	14.1	#NULL!
18	3	1	19.15	0.798619	2	56	130	80	27	24	49	105.191	9.1	4.5	3.48	0.88	2.03	8.44	10.6	168	86.9	30.7894	18.6	19.7	1.36	1.53799	0.884498	8.1	42.915	3.97618	0.954545	7.81429	5.6	12.2	7.9	5.8	6	8.9	8.3
19	20	1	19.45	0.484211	2	65	146	76	54	30	46.3	100.586	10.5	3.54	0.94	1.19	2.08	4.79	13.21	148	57	26.0226	17.8	21.1	1.28	1.5463	0.875	6.2	204.806	2.22515	0.864583	7.61667	5.7	9	9	7.1	6.4	8.5	#NULL!
20	6	1	19.5	0.546939	2	55	120	70	18	15	67.8	87.2022	10.1	6.46	1.95	1.34	3.27	11.96	5.8	160	73.5	28.7109	18.9	20.1	1.35	1.42808	0.818493	6.8	13.7116	3.08302	0.95	7.78571	5.4	5.8	4.4	11.5	10	10.6	6.8
21	0	1	19.6	0.629149	2	60	140	80	27	18	58.9	99.6131	10.8	4.67	1.47	1.31	2.14	10.88	4.1	162	69.3	26.406	20.3	18.9	1.23	1.7562	1.02066	7.1	11.1111	1.98258	0.918367	6.07143	4.9	6.4	5.4	4.9	5.4	6.2	9.3
22	5	1	19.8	0.587387	2	60	100	60	13	10	49.8	101.672	11.8	5.35	0.65	1.4	2.85	10.81	4.4	161	55.5	21.4112	20.1	19.5	1.22	2.73944	1.57042	6.3	12.0383	2.11396	0.909091	6.55714	5.9	6	4.8	9.4	6.5	6.3	7
23	0	1	20	0.883792	2	49	130	80	24.8	10	111.6	50.1477	11	7.52	3.29	1.48	3.48	15.51	9.3	162	65.4	24.92	19	21	1.44	1.99052	1.1564	7.6	15.4871	6.4108	0.93617	8.94286	6.9	9	9.8	11.8	11.7	7	6.4
24	0	1	20.1	1.03036	2	48	138	82	36	19	42.3	116.368	9.2	3.67	3.7	1.04	1.74	10.54	26.36	150	52.7	23.4222	19.4	20.8	1.08	1.94767	1.09884	6.1	74.8864	12.3482	#NULL!	10.4	5.8	13.3	11.5	10.8	9.8	12.3	9.3
25	6	1	20.15	0.69726	2	64	160	80	24	17	44.7	101.944	11.9	9.39	1.95	1.46	4.83	12.75	4.7	161	73	28.1625	19.9	20.4	1.25	1.28155	0.731392	6.6	10.1622	2.66333	0.978947	8.01571	6.73	11.26	5.91	6.89	6.93	9.91	8.48
26	0.25	1	20.15	0.703762	2	51	90	60	48	38	70.6	85.6371	11.8	4.17	6.64	0.82	2.44	10.37	17.54	158	63.8	25.5568	21.3	19	1.12	1.48387	0.842742	6.1	51.0626	8.08399	0.978723	7.78571	7.1	9.9	7	8	5.1	7.9	9.5
90	2	2	30.55	0.351415	1	38	112	76	57	36	94.6	87.588	8.6	6.52	2.81	1.06	4.58	8.93	13.01	180	84.8	26.1728	30	31.1	1.3	2.61333	1.57333	8.2	47.919	5.16352	1	7.65	6.8	#NULL!	6.5	10.8	5.6	9.3	6.9
28	10	1	20.25	0.477352	2	63	140	80	19	18	52.7	97.3174	11.1	3.95	1.17	0.92	1.92	11.76	21.5	163	57.4	21.6041	20.4	20.1	1.53	1.95187	1.10695	6	52.0581	11.2373	0.944444	8.8	6.7	8.5	7.2	9	9.8	10.6	9.8
29	5	1	20.3	0.672727	2	52	140	95	25	29	50.3	106.925	13	6.11	6.44	0.98	2.5	9.88	4.2	150	55	24.4444	19.5	21.1	1.24	#NULL!	#NULL!	#NULL!	13.1661	1.84427	0.910112	6.77143	4.4	4.4	9.3	9.5	5.6	8.3	5.9
105	0.5	2	32.9	0.512484	1	39	120	100	3	6	70.3	112.529	8.5	3.75	1.54	1.07	2.39	12.65	#NULL!	176	76.1	24.5674	31.9	33.9	1.35	2.34862	1.38532	7.7	#NULL!	#NULL!	#NULL!	6.77143	5.4	9.4	6.3	7.6	5.8	6.9	6
31	1	1	20.45	0.677979	2	46	125	90	11	9	26.3	137.75	12.3	5.04	2.43	1.37	2.19	15.78	2.4	160	66.3	25.8984	20	20.9	1.26	1.6405	0.938017	6.5	3.90879	1.6832	0.94	8.07857	6.4	10	7.04	9.21	6.3	8.8	8.8
32	0	1	20.6	0.610063	2	49	110	70	40	36	39.2	118.91	11.1	4.42	2.89	1.23	1.91	6.28	10.7	160	63.6	24.8437	21.1	20.1	1.4	1.79909	1.03196	6.8	76.9784	2.98649	0.916667	7.25	7.2	6.4	6.7	9.4	6.9	6.9	#NULL!
33	6	1	20.75	0.640254	2	63	120	70	15	14	44.2	103.334	12.6	4.14	1.72	1.19	2.47	7.98	#NULL!	159	63.1	24.9595	18.3	23.2	1.19	1.83178	1.03738	6.3	#NULL!	#NULL!	0.93617	9.55	8.3	13.2	10.6	8.5	7.6	9.1	#NULL!
34	0.5	1	21	0.518883	2	59	90	70	53	27	45	105.65	10.8	7.63	4.93	1.02	4.57	13.62	5.9	161	60.9	23.4945	21.8	20.2	1.32	1.65158	0.936652	5.9	11.6601	3.57147	0.922222	6.28571	4.7	7.5	6.7	5.6	6.3	5.6	7.6
35	0	1	21.2	0.711785	1	46	130	90	76	46	62.4	112.515	9.2	3.9	3.49	0.93	1.31	5.97	9	173	85.7	28.6344	17.8	24.6	1.34	2.07463	1.23881	8.4	72.8745	2.388	0.980198	7.04286	5.5	7.2	5	7.5	6.4	9.5	8.2
36	5	1	21.25	0.553125	1	68	110	70	25	18	67.3	93.7448	9.4	2.72	0.98	1.13	1.03	7.53	3.2	158	64	25.6369	22.5	20	1.15	2.52	1.48	7.9	15.8809	1.07093	1.05	8	5.7	11.4	8.7	4.2	7.7	9	9.3
115	0.1	2	34.3	0.529492	1	59	120	86	20	13	80.66	91.9227	8.7	4.03	1.14	0.98	1.99	6.41	10.6	170	72.9	25.2249	35.3	33.3	1.2	2.67895	1.57895	7.6	72.8522	3.01982	0.92	6.54286	5.1	4.9	5.7	8.4	7.2	6.5	8
38	10	1	21.55	0.517647	1	51	130	70	19	10	68.6	104.514	10.4	5.6	1.88	1.02	2.77	10.8	20.5	160	68	26.5625	20.8	22.3	1.21	1.69262	0.983607	7.1	56.1644	9.84	0.969697	9.53333	5.4	9.7	10.7	8	9.8	13.6	#NULL!
119	1	2	34.8	0.335534	1	34	110	70	27	15	70	117.155	8.9	5.17	2.13	0.92	3.27	8.64	3.2	182	90.9	27.4423	34.6	35	1.26	2.33716	1.37931	8.6	12.4514	1.2288	0.915888	6.70857	5.09	8.48	6.52	7.5	7.07	5.8	6.5
138	1	3	38.35	0.490854	1	51	147	89	14	13	63.2	108.632	8.2	4.7	1.44	1.04	3.16	8.75	3.65	173	65.6	21.9185	36.1	40.6	1.2	3.07143	1.80519	6.9	13.9048	1.41944	0.935484	7.02857	6.2	9.9	5.7	6.8	4.7	8.2	7.7
153	1	3	40.55	0.413534	1	34	120	80	80	24	69.6	117.155	8.5	6.36	2.66	0.98	4.31	10.93	#NULL!	170	79.8	27.6125	40.1	41	1.24	2.78713	1.67822	8.6	#NULL!	#NULL!	0.93617	9.3	7.6	16.4	8.8	8.6	7.5	9.7	6.5
42	12	1	21.95	0.805792	2	56	176	100	15	8	47.9	105.828	9	4.41	1.37	1.18	2.1	8.57	4.7	161	58.7	22.6457	20.5	23.4	1.3	1.77833	1.00493	5.9	18.5404	1.79018	0.898876	8.42857	5.4	16.4	8.8	9.9	5.1	6.7	6.7
43	0	1	21.95	1.06015	2	36	111	76	41.4	29	41.7	127.483	9.7	6.7	2.1	1.12	4.6	8.56	#NULL!	155	53.2	22.1436	22	21.9	1.25	2.47619	1.45578	6.3	#NULL!	#NULL!	1.01136	7	5	10.4	5.6	5.2	8.9	6.9	#NULL!
44	6	1	22	0.629851	2	51	130	70	14.7	13.6	179.2	27.7802	10.4	6.8	6.87	0.98	3.27	7.55	#NULL!	165	67	24.6097	22.2	21.8	1.18	2.55556	1.50556	7	#NULL!	#NULL!	1.04762	8.14286	6.3	9	7.2	10	6.1	10.2	8.2
45	22	1	22.15	0.868217	2	49	122	80	35	20	32.6	125.885	12	7.65	2.45	1.28	4.02	15.93	12.8	158	64.5	25.8372	22.3	22	1.2	1.35227	0.772727	5.9	20.5953	9.0624	0.882353	10.1143	7.13	13.45	10.97	10.85	9.62	10.15	8.63
46	5	1	22.3	0.500759	2	62	124	80	27	16	51.8	98.5469	9.9	5.4	1.68	1.31	2.37	8.33	8.4	160	65.9	25.7422	22.5	22.1	1.3	1.97653	1.14085	7.1	34.7826	3.10987	0.913978	9.55714	6.2	12	9.3	9.8	8.5	12.5	8.6
47	0.2	1	22.3	0.426698	1	35	110	80	16	10	52.7	130.262	12.4	5.42	1.27	1.24	2.73	6.29	6.1	182	83.9	25.3291	21.1	23.5	1.42	1.67881	0.970199	7.7	43.7276	1.70529	0.968421	6.01667	6.1	9	3	5	6	7	#NULL!
48	36	1	22.55	0.714524	2	43	120	80	72.9	43.4	35.9	126.944	10.7	4.25	1.55	0.94	3.08	11.78	10.45	158	59.9	23.9946	22.3	22.8	1.2	1.88945	1.07538	6.1	25.2415	5.47116	0.976471	7.48571	9.2	10.4	6.5	6.8	5.3	7.9	6.3
49	0	1	22.75	0.63253	1	64	118	70	7	11	83.7	84.2524	11.5	4.47	1.67	0.97	2.87	4.24	#NULL!	170	66.4	22.9758	21.3	24.2	1.25	2.85455	1.67273	7.3	#NULL!	#NULL!	0.93617	9.28333	7.3	11	5.8	8	10.7	12.9	#NULL!
50	0.5	1	23.1	0.821981	1	47	120	78	13	12	69.9	106.931	12.8	5.85	0.94	1.41	2.78	10.67	2.7	169	64.6	22.6183	22.9	23.3	1.22	3.71756	2.20611	7.4	7.53138	1.2804	0.930233	8.87143	7	13.4	13.3	8.6	5.9	7.9	6
51	40	1	23.6	0.956522	1	68	165	103	13.8	15.6	94.5	70.9451	15.7	5.64	2.17	1.06	4.06	7.91	12.56	176	64.4	20.7903	23.2	24	1.18	2.96795	1.6859	7	56.9615	4.41554	0.958333	7.82857	5.3	10.8	6.8	7.3	7.7	8.9	8
52	0	1	23.65	0.913158	1	42	130	90	91	58	57.2	119.998	10.6	4.15	3.93	0.82	2.71	14.6	#NULL!	172	76	25.6896	23.2	24.1	1.29	1.83721	1.06977	7.1	#NULL!	#NULL!	0.93617	7.31429	5.8	11.5	7.3	7.9	5.7	8.1	4.9
53	0	1	23.65	0.629349	2	69	170	100	7	8	79.9	65.4493	10	4.94	2.22	1.41	2.09	10.51	13.6	165	66.1	24.2792	24.2	23.1	1.29	2.37234	1.37766	7	38.8017	6.35271	0.933333	8.64286	6.8	8.7	10.1	7	7.2	10.3	10.4
54	10	1	23.65	0.42471	2	54	120	70	12	9	51.8	104.243	9.9	7.91	1.04	1.54	3.52	8.64	1.9	162	51.8	19.7378	23.1	24.2	1.32	2.03049	1.14024	5.5	7.393	0.7296	0.963415	7.65714	6.6	9.3	8.6	9.4	7.3	5.9	6.5
55	1.3	1	23.8	0.315789	2	63	120	80	14	19	42.5	104.731	9.5	4.65	1.23	1.27	2.89	7.34	4.62	155	58.9	24.5161	23.1	24.5	1.03	1.86364	1.06061	6.4	24.0625	1.50715	0.93617	6.87143	6.9	8.5	6.4	7.4	5.5	6.6	6.8
159	0.3	3	42	0.2571	1	60	120	80	24.8	19	69.8	97.5985	8	4.96	2.17	1.29	1.81	4.78	2.4	168	66.9	23.7032	41.3	42.7	1.46	2.06667	1.20952	7	37.5	0.509867	0.913043	5.97143	5.2	7.5	6.4	7.1	4.4	5.9	5.3
57	2	1	23.9	0.885397	2	44	132	93	23.1	12.9	40.7	121.372	14.8	2.82	0.42	1.55	1.14	17.07	1.87	160	54.1	21.1328	20.3	27.5	1.25	2.05294	1.17059	5.7	2.75608	1.41871	0.963855	5.48571	4.6	9.1	6	5.4	3.4	5.3	4.6
58	0	1	24.05	1.02024	2	31	111	78	14.7	17.1	32.3	142.853	14	4.85	1.18	1.44	3.03	9.75	10.41	168	59.3	21.0105	22.6	25.5	1.25	2.88356	1.66438	6.3	33.312	4.511	0.89011	7.68571	6.2	5.9	7	7	12.7	6.4	8.6
59	0	1	24.05	1.02024	2	31	111	78	14.7	17.1	32.3	142.853	14	4.85	1.18	1.44	3.03	9.75	10.41	168	59.3	21.0105	22.6	25.5	1.25	2.88356	1.66438	6.3	33.312	4.511	0.89011	7.68571	6.2	5.9	7	7	12.7	6.4	8.6
60	24	1	24.1	0.444015	2	33	110	70	11	12	39.1	133.054	10.1	#NULL!	#NULL!	#NULL!	#NULL!	#NULL!	#NULL!	158	51.8	20.7499	23	25.2	#NULL!	2.42069	1.36552	5.6	#NULL!	#NULL!	0.865169	7.55714	7.2	4.8	8.8	9.9	7.7	6.5	8
61	0	2	24.4	0.9792	2	32	110	78	15	7	41	132.047	10.1	5.49	1.96	1.33	3.43	13.81	5.96	151	62.5	27.4111	23.7	25.1	1.25	1.47951	0.848361	6.8	11.5616	3.65812	0.93617	7.85714	5.1	11.1	7.4	7.7	7.5	9.2	7
62	0	2	24.65	0.738516	2	46	119	87	13	16	47	114.23	12.9	4.52	1.43	1.44	2.76	7.54	12.9	160	56.6	22.1094	26.6	22.7	1.2	2.29091	1.31515	6.4	63.8614	4.32293	0.888889	8.15714	6.9	12.9	8.3	6.4	5.6	8.7	8.3
170	0	3	44.15	0.450346	1	47	154	100	88	93.9	56.5	116.597	8.3	7.76	2	1.28	5.59	9.78	9.62	163	86.6	32.5944	43.1	45.2	1.28	1.59133	0.95356	8.1	30.6369	4.18149	0.924528	7.11429	7.4	9.2	5.4	8	5.3	8.3	6.2
64	18	2	24.8	0.440594	2	51	118	78	19.4	13.5	52.2	106.464	10.5	4.6	0.75	1.29	3.17	5.99	20.96	165	80.8	29.6786	25.4	24.2	1.3	1.54072	0.908795	7.5	168.353	5.58002	0.931373	6.55714	5.9	9.6	5.7	5.8	5.8	8	5.1
65	6	2	25.35	0.602541	2	66	178	90	16	10	57.3	92.8115	10.5	5.75	3.66	1.03	2.18	7.03	5.9	158	55.1	22.0718	25.5	25.2	1.43	1.82447	1.03191	6	33.4278	1.84342	0.964706	7.37143	7.3	5.9	5	9.9	9.2	6.9	7.4
66	0.2	2	25.85	0.622036	2	53	120	90	15	16	51.1	105.57	11.9	5.8	1.36	1.5	2.85	7.62	10.2	156	71.7	29.4625	27.6	24.1	1.3	1.23151	0.697749	6.9	49.5146	3.4544	0.961165	7.7	6.9	12.1	6.2	7.9	5.1	6.9	8.8
67	0	2	26.15	0.301242	2	59	145	80	27	18	48.2	102.997	9.3	4.43	1.21	1.08	1.97	7.92	4.5	164	64.4	23.9441	23.3	29	1.35	2.04433	1.18227	6.5	20.362	1.584	0.902174	7.02857	5.9	6.5	6.4	9.3	7.9	7.5	5.7
171	0.5	3	44.25	0.546185	1	60	143	86	20.9	13.8	60.1	103.802	8.6	4.67	2.92	0.82	2.83	9.06	#NULL!	176	74.7	24.1154	46	42.5	1.23	3.6732	2.18954	8	#NULL!	#NULL!	0.93617	7.81429	6.2	11.7	5.9	7.5	5.8	9.4	8.2
69	24	2	26.55	0.618875	2	51	130	80	23	16	56.3	103.652	10.3	5.56	1.32	1.13	3.71	7.98	11.12	158	55.1	22.0718	26.4	26.7	1.25	1.98315	1.13483	6	49.6429	3.94389	0.922222	7.55714	5.6	10.1	5.7	10.3	7.7	6.9	6.6
70	0	2	27.35	0.607199	1	66	120	70	23	17.4	77.64	89.58	13	5.86	3.39	#NULL!	3.12	#NULL!	#NULL!	165	63.9	23.4711	28.3	26.4	1.31	2.61176	1.52941	7	#NULL!	#NULL!	0.904255	7.65714	6	9	4	9.4	6.8	9.7	8.7
71	2	2	27.45	0.811526	2	56	130	105	26	25	56.5	100.075	13	6.03	1.48	1.12	4.32	15.83	6.58	159	64.2	25.3946	29.1	25.8	1.3	1.5122	0.869919	6	10.6732	4.6294	0.957447	8.16667	5.7	11.6	8.8	4.7	8.8	9.4	#NULL!
72	0	2	27.5	0.486128	1	31	120	80	49	31	56.5	130.467	10.1	5.55	2.13	0.88	4.06	7.15	15.66	175	82.9	27.0694	29	26	1.26	2.23673	1.35102	7.9	85.8082	4.9764	0.93617	6.86667	6.3	8.4	5.3	#NULL!	6.3	7.5	7.4
73	24	2	27.6	0.618634	2	41	120	80	19.2	8.8	43.3	121.407	10.9	4.92	2.68	0.79	3.42	8.6	13.78	162	80.5	30.6737	26.4	28.8	1.31	1.07733	0.618667	6.8	54.0392	5.26702	0.944444	9.42857	6.7	11.5	7.8	11	10.5	9.3	9.2
74	1	2	27.65	0.68895	1	38	134	82	35	24	60.9	120.425	13.6	4.55	1.05	1.16	2.73	6.47	11.66	168	73.3	25.9708	30.9	24.4	1.2	1.86235	1.08907	7.4	78.5185	3.3529	0.956989	7.28571	5.2	12	5.6	6.4	4.8	9.6	7.4
75	20	2	27.65	0.844854	1	69	110	70	15	15	71.1	91.1467	9.1	4.09	1.37	1.06	1.92	10.63	7.9	173	65.1	21.7515	25.1	30.2	1.51	3.12583	1.81457	7.2	22.1599	3.73231	0.956522	9.48571	7.3	13.3	7.6	8.8	10.3	10	9.1
76	0	2	27.7	0.485842	1	50	129	90	12	17	68.2	105.81	10.5	6.28	1.08	0.92	4.5	4.89	12.1	165	67.1	24.6465	29.6	25.8	1.23	2.25253	1.31818	6.9	174.101	2.62973	0.93617	8.21429	5.3	9.5	9.4	9.4	5	9.2	9.7
77	1	2	28	0.503864	2	53	158	102	23	20	44.1	110.853	13	6.09	0.66	1.26	4.23	6.99	#NULL!	161	64.7	24.9605	28.9	27.1	1.2	2.22917	1.29167	6.9	#NULL!	#NULL!	0.979167	7.01429	5.4	8.6	6.3	9.9	4.8	7.9	6.2
78	0	2	28.65	0.507853	1	68	114	66	21	18	69.3	92.7493	10.1	3.13	1.15	0.9	1.53	6.69	4.7	171	76.4	26.1277	28	29.3	1.78	2.0625	1.1875	8	29.4671	1.39747	0.928571	7.48571	6.6	13.9	6.2	8.4	6	5.7	5.6
79	1	2	28.7	1.07368	1	67	150	100	12	11	56.8	101.315	15.2	5.47	1.12	1.21	3.67	11.26	#NULL!	162	47.5	18.0994	28.3	29.1	1.31	5.02667	2.86667	5.9	#NULL!	#NULL!	0.870588	7.8	4	10.5	5.3	9.5	10.1	7	8.2
80	0	2	28.8	0.735669	1	56	104	80	45	30	83.1	90.2703	13	4.17	1.21	0.81	2.05	6.77	8.9	167	62.8	22.5178	24.3	33.3	1.2	2.58929	1.51786	6.8	54.4343	2.67791	0.978261	7.27143	5.7	9.5	4.9	8.8	5.7	7.3	9
81	1	2	29	0.529183	1	52	140	90	22	13	81.4	95.2883	9.8	4.88	1.09	1	2.56	7.49	4.5	168	77.1	27.3172	28.6	29.4	1.4	2.46729	1.44393	8.5	22.5564	1.498	0.926316	7.37143	5.7	7.5	5.2	9.3	9.2	8.2	6.5
82	12	2	29.3	0.553223	1	57	110	60	12	9	38.3	127.987	9.8	3.89	1.98	0.95	1.7	10.09	3.7	168	66.7	23.6324	28.8	29.8	1.18	5.22549	3.08824	8.3	11.2291	1.65924	0.882979	8.69143	6.23	9.89	9.69	9.78	7.87	9.05	8.33
83	0	2	29.4	0.352049	1	65	136	74	18	12	50.5	107.758	9.3	4.44	1.29	1.31	1.91	9.02	5.7	165	65.9	24.2057	29.6	29.2	1.69	2.72353	1.57647	7.5	20.6522	2.28507	0.913978	7.01714	4.9	10.44	5.64	7.21	6.3	7.19	7.44
84	12	2	29.45	0.400523	1	61	140	90	12	7	55.6	106.362	10.1	4.27	2.21	0.74	2.34	14.78	7.7	173	76.5	25.5605	28.4	30.5	1.24	1.95582	1.14458	7.2	13.6525	5.05804	0.895833	7.55571	7.01	8.3	6.46	7.67	7.61	7.6	8.24
85	10	2	29.6	0.605341	2	55	132	90	34	23	45.5	108.597	9.2	4.89	1.82	1.76	2.12	10.67	5.4	170	101.1	34.9827	28.6	30.6	1.13	0.954365	0.551587	8.2	15.0628	2.5608	0.964602	8.9	6.5	12	8.6	8.9	6.7	10.3	9.3
86	2	2	29.6	0.377333	1	55	136	78	14	15	56.1	110.941	9.6	5.09	0.9	1.12	3.45	5.85	#NULL!	176	75	24.2123	29.9	29.3	1.27	3.86395	2.28571	8.1	#NULL!	#NULL!	1.04301	7.98571	5	7.7	6.1	12.9	8	6.9	9.3
87	1	2	29.65	0.526485	2	67	104	58	14	18	55.4	93.1143	15.2	3.92	1.2	0.86	2.72	16.53	8.71	155	62.3	25.9313	17.8	41.5	0.93	1.38492	0.77381	5.8	13.3691	6.39895	0.98	6.14286	6.2	4.3	5.6	10	5.7	5.1	6.1
88	1	2	30.25	0.481544	1	39	120	80	8	4	64.1	116.844	9.7	4.97	3.65	0.87	2.23	11.1	39.3	175	74.5	24.3265	27.6	32.9	1.42	3.45625	2.05625	8.4	103.421	19.388	0.938776	8.58429	7.12	10.56	9.07	9.4	6.69	8.78	8.47
2	20	1	17.6	0.942553	2	66	114	74	16.9	11.8	49.5	97.4757	8.7	3.34	1.35	1.07	1.96	7.09	13.53	151	47	20.6131	17.9	17.3	1.03	2.15385	1.18881	5.2	75.376	4.26345	0.918605	6.28571	5.6	8.8	4.3	7.5	5.3	5.5	7
9	7	1	17.15	0.430556	2	60	120	70	21	17	54.3	98.851	7.9	4.41	0.98	1.49	1.89	7.23	3.8	160	64.8	25.3125	20.9	13.4	0.96	1.496	0.848	6.2	20.3753	1.22107	0.882353	7.77143	5.9	10.9	5.2	8.5	8.5	9.8	5.6
91	0	2	30.55	0.606004	1	57	120	80	11.5	10.8	45.3	119.319	12.7	6.15	0.7	1.25	4.53	6.45	6.61	160	53.3	20.8203	30	31.1	1.26	3.95146	2.27184	6.6	44.8136	1.89487	0.77381	9.65714	6.8	12.6	9.2	9.8	7.5	11.8	9.9
92	0.1	2	30.65	0.726302	1	59	140	80	34	14	56.5	107.171	12.1	3.55	3.88	0.8	1.41	6.03	7.4	170	74.9	25.917	30.9	30.4	1.29	1.73864	1.01136	7.5	58.498	1.9832	0.948454	7.1	5.4	6.1	6.7	7.7	10.1	8.1	5.6
93	2	2	30.7	0.576976	1	58	120	80	13	12	72.9	97.4747	12	5.44	1.02	0.94	3.74	6.38	#NULL!	176	72.1	23.2761	29.6	31.8	1.2	2.89266	1.70056	7.3	#NULL!	#NULL!	1.04444	8.64286	7.3	9.4	6	12.2	9.4	8.3	7.9
94	24	2	30.8	0.584302	1	63	138	78	38	22.8	65.8	98.166	11	4.37	1.49	1.09	3.05	10.41	14.02	168	68.8	24.3764	33.2	28.4	1.16	4.93636	2.98182	7.9	40.5789	6.48659	0.904255	8.85714	5	15	8.8	10	6.3	9.3	7.6
95	0	2	31.15	0.441347	1	63	100	80	17	16	58.9	102.258	12.5	5.45	1.19	1.21	3.62	13.8	7.58	170	86.1	29.7924	33.9	28.4	1.3	2.09363	1.23596	8.8	14.7184	4.64907	1.09524	6.72857	5.3	10	10.1	4.8	5.8	6.9	4.2
96	5	2	31.15	0.316265	1	65	130	80	24	21	75.4	91.31	9.2	5.75	1.13	1.99	2.51	5.69	2.4	172	66.4	22.4446	29	33.3	1.28	2.32813	1.36458	7	21.9178	0.606933	0.888889	6.64286	5.8	10.4	4.3	5.5	6.5	7.5	6.5
97	0	2	31.55	0.492476	1	45	100	70	16	18	#NULL!	#NULL!	12.2	3.99	1.33	0.89	2.11	16	1.35	170	73.1	25.2941	31.7	31.4	1.46	2.63731	1.57513	7.9	2.16	0.96	0.9	7.67143	6.4	4.9	8	5.2	8.9	13	7.3
98	12	2	31.65	0.489412	1	42	130	80	18.9	13.3	82.6	100.895	12	9.51	3.98	1.2	4.69	12.35	4.02	174	85	28.075	30.8	32.5	1.35	2.43882	1.45148	8.5	9.08475	2.20653	0.969388	8.32857	6.5	11.2	8.6	9.5	7.4	5.8	9.3
99	0.3	2	32.45	0.468541	1	54	130	90	25	21	111.5	64.2406	10.4	5.34	3.1	0.9	2.64	8.45	7	170	74.7	25.8478	29.1	35.8	1.28	2.24324	1.33333	7.8	28.2828	2.62889	0.959596	5.85714	5.6	5.6	4.9	5.5	5.6	7.1	6.7
100	10	2	32.45	0.314839	1	53	134	76	15	10	50.3	117.235	10	4.84	1.86	1.25	2.29	7.92	3.2	180	77.5	23.9198	29.1	35.8	1.28	3.89404	2.27815	8.5	14.4796	1.1264	0.907216	6.94286	4.4	10.4	8.1	5.6	5.3	6	8.8
101	48	2	32.5	0.544601	1	56	107	71	12.4	12.5	60.8	106.122	12.2	4.66	2.27	1.19	2.72	12.49	16.16	172	63.9	21.5995	31.5	33.5	1.25	2.96753	1.72727	6.7	35.9511	8.9706	0.893617	8.4	4.8	6.8	9.2	9.1	8	9.4	11.5
15	2	1	18.15	0.581022	2	63	120	80	17	11	69.3	81.1608	8.8	3.76	0.99	1.24	1.72	9.56	8	163	68.5	25.7819	18.1	18.2	1.51	1.2628	0.723549	6	26.4026	3.39911	0.918367	8.58333	8.3	8.6	5.5	9	8.1	12	#NULL!
103	10	2	32.7	0.404221	1	68	160	100	8	14	92.5	72.5821	9.9	5.75	1.43	1.43	2.82	8.53	2.3	174	61.6	20.3461	29.6	35.8	1.25	2.96644	1.71812	6.9	9.14513	0.871956	0.917647	9	7	12.7	9.2	10.4	7.3	8.6	7.8
104	0	2	32.75	0.479564	1	38	110	85	15.6	15.5	78.2	108.969	13.3	5.2	1.04	1.09	3.51	7.66	22.28	178	73.4	23.1663	29.7	35.8	1.45	2.96045	1.73446	7.5	107.115	7.5851	0.925532	8.95714	5.8	12.2	6.9	11.2	7.5	11.7	7.4
27	1	1	20.2	0.624179	2	48	130	80	24	16	34.1	124.596	7.8	5.67	3.19	1.3	2.73	8.75	9	160	76.1	29.7266	22.1	18.3	1.36	1.28571	0.736025	7	34.2857	3.5	0.908257	8.47143	5.3	9.5	4.1	13.2	7.4	10.9	8.9
106	0	2	32.9	0.588556	1	46	130	90	37	18	63.3	111.87	11.1	6.7	1.09	1.39	4.95	13.72	8.1	174	73.4	24.2436	31.9	33.9	1.23	1.77647	1.0549	6.8	15.8513	4.9392	#NULL!	6.87143	5.8	8.2	4.4	8.7	6.8	8.5	5.7
107	1	2	32.95	0.710078	1	34	140	100	25	9	37.2	151.891	12.2	5.24	1.31	0.94	2.63	6.62	2.9	172	64.5	21.8023	31.4	34.5	1.24	3.96774	2.3629	7.4	18.5897	0.853244	0.911111	9.33714	6.66	9.94	9.95	8.45	13.36	8.12	8.88
108	1	2	33.05	0.466307	1	50	120	90	34	25	62.9	109.398	9.4	5.5	2.3	0.9	3.91	8.09	10.29	170	74.2	25.6747	35.2	30.9	1.36	2.62755	1.55612	7.6	44.8366	3.69983	0.977778	9.31429	7	10.9	8.1	10.2	8.7	11.2	9.1
109	0.3	2	33.1	0.55168	1	40	110	70	24	13	60.9	118.745	13.1	6.33	1.52	1.37	3.99	8.56	#NULL!	173	77.4	25.8612	32.3	33.9	1.3	3.30814	1.96512	8.4	#NULL!	#NULL!	0.989583	7.72857	7.7	10.8	5.3	7.7	7	8.7	6.9
37	20	1	21.5	0.420949	2	69	130	80	24.7	11	52.1	93.8183	8.1	4.48	1.5	1.31	2.04	7.39	2.5	154	50.6	21.3358	20.9	22.1	1.36	2.11538	1.1859	5.7	12.8535	0.821111	0.914634	7.18571	6.6	6.7	7.2	8.7	6.9	5.9	8.3
111	0	2	33.45	0.908623	1	51	116	74	39	16	59.1	111.252	12.4	6.32	2.51	1.41	3.01	14.16	4.9	175	77.7	25.3714	34.4	32.5	1.24	2.81026	1.69231	7.9	9.19325	3.08373	0.923913	7.93714	6.93	8.37	8.8	8.12	7.12	8.22	8
112	3	2	33.95	0.395415	1	50	120	80	14	8	67.3	106.38	11.2	3.86	1.35	0.85	2.6	6.93	#NULL!	175	69.8	22.7918	33.8	34.1	1.32	3.25478	1.92357	7.6	#NULL!	#NULL!	#NULL!	8.35714	5.3	9.3	7.5	6.8	11.6	8.3	9.7
113	48	2	34	0.622478	1	57	130	88	15	15	69.3	100.2	10.1	4.82	3.11	1	2.01	11.54	1.7	166	69.4	25.1851	33.4	34.6	1.28	3.13665	1.85714	8	4.22886	0.871911	0.978261	9.21857	6.52	12.25	10.2	7.95	7.69	10.31	9.61
114	0	2	34.05	0.406417	1	47	120	80	83.6	47.1	68.4	108.064	9.8	3.21	0.59	0.91	2.07	6.47	#NULL!	170	93.5	32.3529	33.6	34.5	1.2	1.84543	1.10726	9	#NULL!	#NULL!	1.06122	7.77143	6.2	11.9	7.8	9.4	6.5	6.8	5.8
39	1	1	21.75	0.414336	2	61	110	80	13	13	49.3	100.96	7.5	4.63	0.85	1.4	2.25	8.49	3.5	146	57.2	26.8343	21.5	22	1.39	1.34322	0.75	5.7	14.0281	1.32067	0.904255	7.48571	7.5	10.5	5	8	10.3	5.3	5.8
116	4	2	34.35	0.27476	1	64	150	90	13	11	71.1	94.4049	9.2	4.11	0.74	1.22	2.11	5.8	2.5	162	62.6	23.8531	34.1	34.6	1.34	2.30769	1.33516	6.9	21.7391	0.644444	0.888889	8.01429	5.6	9.8	5	10.5	8.9	7	9.3
117	0.1	2	34.5	0.395322	1	50	138	100	27	15	82.9	94.1563	9.1	4.56	3.48	1.09	1.93	6.66	11.5	173	85.5	28.5676	35	34	1.2	2.40664	1.42324	8.8	72.7848	3.404	0.942857	7.67143	5.5	9.1	7.5	9.5	5.1	7.7	9.3
118	0.6	2	34.7	0.597222	1	65	120	80	12.2	13.5	74.2	91.883	11.4	4.38	0.64	1.23	2.81	4.87	#NULL!	170	64.8	22.4221	33.8	35.6	1.2	2.875	1.675	7	#NULL!	#NULL!	#NULL!	6.68571	4.6	7.3	5	13.7	6.8	5.3	4.1
40	1	1	21.75	0.354588	2	56	110	70	24	15	43.8	108.542	8.9	4.32	1.69	1.12	1.97	6.3	5.1	161	64.3	24.8061	21.9	21.6	1.8	1.29889	0.734317	6.3	36.4286	1.428	0.914894	7.55	6.3	8.8	6.2	9.2	7.8	7	#NULL!
120	1	2	35.1	0.866803	1	58	120	90	23.6	20.9	59.3	105.914	15	5.35	0.44	1.39	3.51	5.1	12.47	160	48.8	19.0625	31.1	39.1	1.32	4.60241	2.6747	6.2	155.875	2.82653	0.928571	7.66667	6.3	9.5	6.2	7.4	6	10.6	#NULL!
121	10	3	35.5	0.402357	1	65	130	90	22	13	75.3	91.4372	10.1	5.39	1.13	1.21	2.57	9.48	1	171	59.4	20.3139	34.9	36.1	1.76	3.97368	2.28947	6.9	3.34448	0.421333	0.939759	6.98571	7.2	9.3	8.2	6.8	6.7	5.7	5
122	0.5	3	36.05	0.605965	1	32	123	89	#NULL!	#NULL!	#NULL!	#NULL!	11.2	#NULL!	#NULL!	#NULL!	#NULL!	#NULL!	#NULL!	174	63.7	21.0398	34.1	38	1.36	4.41964	2.59821	7.4	#NULL!	#NULL!	#NULL!	6.88333	7	#NULL!	5.4	5.4	8.8	6	8.7
123	24	3	36.15	0.488131	1	46	140	100	9	12	54.2	119.759	9.5	5.11	1.91	0.89	3.43	11.9	5.55	169	67.4	23.5986	35.6	36.7	1.38	3.10828	1.8535	7.6	13.2143	2.93533	0.923077	8.45714	7.7	10.8	6.8	7.5	5.1	11.7	9.6
124	11	3	36.3	0.360119	1	60	146	92	24	11	85.5	84.498	10.5	1.94	0.72	1.18	0.49	8.31	5.6	170	67.2	23.2526	38.7	33.9	1.38	3.65942	2.16667	7.6	23.2848	2.06827	0.989011	7	6.5	6.7	5.1	9.9	6	7.8	#NULL!
125	12	3	36.5	0.637348	1	48	140	90	13	42	59.5	113.621	9.3	6.59	1.87	1.46	3.15	12.71	3.5	165	73.9	27.1442	35	38	1.24	2.22727	1.32273	7.9	7.60043	1.97711	0.897959	9.52571	7.66	10.96	10.56	9.35	9	9.12	10.03
126	24	3	36.7	0.412354	1	68	130	80	12	10	67.5	93.7448	11.4	4.19	0.6	1.3	2.53	5.79	7.11	157	59.9	24.3012	36.5	36.9	1.2	2.83333	1.62	7.3	62.0961	1.82964	0.933333	7.44286	5.7	8.9	7	5.9	6.9	8.5	9.2
127	13	3	36.85	0.540616	1	68	114	62	23	19	85.1	80.8875	10.2	2.24	0.93	1.31	0.57	7.9	20.7	174	71.4	23.583	36.4	37.3	1.38	2.98256	1.73837	7.7	94.0909	7.268	0.924731	7.88571	7.1	7.7	8	7.2	5.5	10.5	9.2
128	24	3	36.85	0.522979	1	46	119	71	23	20	69.1	108.25	10.5	4.1	0.62	1	2.74	5.95	#NULL!	163	63.1	23.7495	34.7	39	1.25	2.92857	1.72727	7.1	#NULL!	#NULL!	0.989362	8.6	7	13.3	7.5	9.5	6.4	8	8.5
129	0	3	36.95	0.477089	1	39	120	80	52	25	58	121.787	11.9	4.64	1.3	1.15	2.2	12.04	9.5	165	74.2	27.2544	36.2	37.7	1.28	2.29032	1.33641	8.3	22.2482	5.08356	0.938144	8.24571	6.17	9.17	8.9	10.79	7.39	7.97	7.33
130	2	3	37	0.548961	1	53	140	100	38	34	61	108.38	10.8	4.98	2.65	1.18	2.67	15.09	2.9	165	67.4	24.7567	36.8	37.2	1.35	2.41053	1.41053	7.4	5.00431	1.94493	0.934783	7.4	5.3	7.7	4.9	10.5	11.7	6.3	5.4
131	40	3	37.15	0.58871	1	68	110	70	34	15	65.7	94.778	10.8	4.24	0.93	1.38	1.71	10.8	3.4	160	62	24.2187	34.8	39.5	1.05	2.88889	1.68627	7.1	9.31507	1.632	0.923913	10.5	7.72	11.74	10.86	11.91	9.94	11.3	10.03
132	3	3	37.3	0.638587	1	56	120	70	21	15	165.7	39.3006	10.4	5.48	1.85	0.82	2.43	8.55	7	168	73.6	26.0771	36.6	38	1.35	2.57576	1.54545	8.1	27.7228	2.66	0.967742	7.61429	4.8	7.2	6.5	8.1	7.8	9.9	9
133	7	3	37.45	0.579276	1	45	136	88	16	12	60.8	114.647	10.2	6.91	5.4	1.29	4.5	12.06	5.05	170	80.1	27.7163	37	37.9	1.8	3.32237	1.98026	8.5	11.7991	2.7068	0.95	8.87143	6.9	7.7	6	12.5	9.4	12.8	6.8
134	1	3	37.75	0.562654	1	63	110	70	56	25	68.5	96.5757	9	4.41	5.29	0.89	1.97	10.57	18.95	173	81.4	27.1977	36.8	38.7	1.25	2.52252	1.50901	8.3	53.6068	8.90229	0.977273	9.66667	7.8	14.5	9.4	10.2	7.7	8.4	#NULL!
135	0.2	3	37.75	0.479016	1	55	110	70	28	17	64.3	104.423	9.9	4.86	1.18	1.09	2.51	8.58	5.3	170	69.1	23.91	38.3	37.2	1.36	3.2987	1.96104	8	20.8661	2.02107	0.918367	8.67143	9.2	8.3	7.1	10.3	6.7	9.6	9.5
136	0.2	3	37.9	0.490662	2	58	110	70	25	13	43.3	107.741	13.6	4.95	1.48	1.56	1.99	12.43	3.1	160	58.9	23.0078	36.7	39.1	1.24	2.42424	1.39394	6.8	6.94289	1.71258	0.836957	8.54286	6.9	15.8	11	7.2	6.5	5.8	6.6
41	14	1	21.85	0.431472	2	62	164	70	17	12	57.9	95.4563	7.5	5.88	1.39	1.67	2.9	9.03	9.2	162	59.1	22.5194	21.5	22.2	1	1.86869	1.06061	6.1	33.2731	3.69227	0.902174	9.67143	7.9	16.2	7.2	11.8	6.7	9.4	8.5
56	6	1	23.9	0.64716	2	56	130	70	19	12	42	110.009	8.9	5.99	1.96	1.23	3.9	15.5	8.3	157	58.1	23.5709	23.8	24	1	1.97861	1.12834	6.1	13.8333	5.71778	0.865979	7.57143	7	7.7	7.2	6	6.6	9.2	9.3
139	0.33	3	38.45	0.374218	1	58	160	110	39	23	80.2	92.5707	10.4	5.07	1.84	1.05	3.18	9.59	#NULL!	165	79.9	29.348	37	39.9	1.37	2.76471	1.64706	8.8	#NULL!	#NULL!	0.956522	9	7	13.4	6.9	8	8	10.9	8.8
140	4	3	38.45	0.435535	1	43	128	86	#NULL!	#NULL!	#NULL!	#NULL!	10.3	5.63	1.13	1.23	2.75	13.89	4	165	63.6	23.3609	38	38.9	1.42	2.40556	1.39444	7.1	7.69971	2.46933	0.93617	8.96286	7.33	10.63	8.67	9.98	7.8	9.78	8.55
141	0.25	3	38.7	0.247496	1	51	120	86	11.5	19.3	56.8	113.366	9.5	4.77	1.02	1.53	2.71	12.28	4.23	170	69.9	24.1869	36.1	41.3	1.39	3.40789	2.01974	8	9.63554	2.30864	#NULL!	7.45714	5.1	11.2	5.9	6.1	6.2	9.9	7.8
142	3	3	38.8	0.269648	1	48	110	80	19	13	62.3	111.594	10.3	5.75	2.35	0.9	2.63	9.53	3.9	172	73.8	24.9459	35.2	42.4	1.45	2.13216	1.24229	7.7	12.9353	1.65187	0.958763	6.5	7.7	5.9	6.1	6.1	6.9	6.1	6.7
143	1	3	38.8	0.554074	1	33	110	60	47	19	50.3	134.919	11.6	5.79	5.94	1.05	2.21	12.32	3.7	168	67.5	23.9158	40	37.6	1.4	3.22876	1.91503	7.7	8.39002	2.02596	0.933333	9.06	7.71	11.02	10.01	8.69	7.97	8.83	9.19
144	0.5	3	38.85	0.470449	2	37	146	98	97	54	39.4	128.415	9.7	6.28	9.24	0.9	2.09	6.78	7.8	158	84.6	33.8888	38.2	39.5	1.57	1.46084	0.849398	8.5	47.561	2.3504	0.964286	7.28571	4.9	8.6	7	7.8	4.6	9.2	8.9
145	5	3	38.85	0.5	1	38	136	80	55	29	66.5	116.368	9.1	4.23	1.85	1.05	2.12	6.19	7.1	186	104.8	30.2925	38.2	39.5	1.57	1.52632	0.902256	8.4	52.7881	1.95329	0.981818	6.21429	5.3	5.6	8.9	5.9	6.5	5.9	5.4
146	12	3	38.85	0.559732	1	57	100	70	32	16	76.4	96.2589	12	4.71	16.4	0.94	3.41	8.92	6.34	170	74.5	25.7785	39.6	38.1	1.29	2.585	1.525	8.3	23.3948	2.51346	0.93617	6.74286	6	7.2	6	8.6	6.7	8.6	4.1
147	3	3	39.2	0.449086	1	44	121	87	15.8	13.9	75.1	105.971	10.8	4.24	0.73	0.8	3.2	6.13	#NULL!	177	76.6	24.4502	38.7	39.7	1.29	5.11765	3.09244	8.6	#NULL!	#NULL!	0.93617	6.62857	4.7	10.3	6.9	7	6	5.2	6.3
148	1	3	39.35	0.35443	1	43	105	80	46	18	68	111.143	10.4	3.63	6.91	0.57	1.34	9.59	3.19	170	79	27.3356	37.5	41.2	1.25	2.36889	1.39556	8.1	10.4762	1.35965	1.02151	7.4	5.3	8.2	9.3	8.7	4.8	9.4	6.1
149	1	3	39.55	0.367862	1	68	146	80	25	39	82	84.0526	14	5.1	2.38	1.12	2.51	17.61	3.5	172	75.3	25.4529	39.1	40	1.14	2.17031	1.27511	7.9	4.96102	2.73933	0.913978	9.56857	7.7	11.97	9.01	11.81	9.82	8.48	8.19
89	24	2	30.55	0.416274	1	38	112	76	57	36	94.6	87.588	8.6	6.52	2.81	1.06	4.58	8.93	13.01	180	84.8	26.1728	30	31.1	1.3	2.61333	1.57333	8.2	47.919	5.16352	1	7.97143	6.2	8.9	7.5	7	7.9	8.8	9.5
151	0.1	3	39.55	0.390578	1	49	120	80	11	14	67.5	107.13	15.5	6	1.29	1.23	2.98	7.54	16.9	170	65.8	22.7682	39.3	39.8	1.5	2.92547	1.72671	7.3	83.6634	5.66338	0.934066	8.64286	4.8	10.7	6.8	8.9	9.2	9.6	10.5
152	15	3	40.25	0.503949	1	63	140	80	14	12	72.1	94.1105	10.5	3.83	0.6	1.34	1.6	10.51	4.2	170	63.3	21.9031	36.7	43.8	1.43	2.89103	1.65385	7.1	11.9829	1.96187	0.928571	6.61429	4.8	7.8	6.7	7.6	5.7	6.3	7.4
102	6	2	32.7	0.513196	1	50	130	90	69	38	77.2	100.631	7.7	6.14	1.39	1.31	3.19	7.71	5.6	169	68.2	23.8787	28.8	36.6	1.31	2.57377	1.51366	7.4	26.6033	1.91893	0.904255	7.28571	4.4	10.8	8.4	6.8	6.1	7.1	7.4
110	12	2	33.1	0.273734	1	59	153	87	19	16	61	103.909	8.8	3.59	1.25	0.8	2.39	5.53	13.2	174	63.2	20.8746	30.4	35.8	1.35	3.44118	2.02941	6.8	130.049	3.24427	0.93617	8.6	6.9	11.1	5.9	10	6	11.4	8.9
155	2	3	41.3	0.654545	1	53	110	70	15	13	73.8	100.457	11.5	4.86	0.9	1.12	2.34	7.5	2.1	178	60.5	19.0948	40.9	41.7	1.52	4.17857	2.46429	7	10.5	0.7	0.878049	7.55	5.9	6.8	9.5	6.8	8.9	7.4	#NULL!
156	10	3	41.6	0.375652	1	51	130	70	57	46	110	66.8903	10	6.2	7.02	1.98	2.53	9.62	5.7	170	57.5	19.8962	40.2	43	1.52	5.85	3.4625	7.2	18.6275	2.43707	0.886364	8.63333	6.8	9.2	12.2	7.4	6.5	9.7	#NULL!
157	0.5	3	41.8	0.400498	1	58	110	90	18	14	55.2	109.344	10.3	5.01	1.11	1.11	2.59	10.97	3.5	171	80.4	27.4956	42.3	41.3	1.68	1.80144	1.05415	7.8	9.37082	1.70644	0.9375	7.08429	6.61	8.17	5.38	8.02	5.53	8.47	7.41
158	6	3	41.95	0.440044	1	40	168	98	18.8	17.8	75.9	108.469	11.2	3.98	0.74	1.25	2.57	5.2	9.25	191	90.9	24.9171	39.5	44.4	1.3	3.35176	1.98995	8.5	108.824	2.13778	0.88785	8.04286	5	10.3	6.1	7	5.7	12.3	9.9
137	2	3	38.35	0.288162	1	63	123	83	1036.5	849.7	53.6	106.278	7.6	2.24	0.99	0.54	1.1	8.34	23.02	173	64.2	21.4508	30.9	45.8	1.24	8.51562	4.98437	8.1	95.124	8.53275	0.93617	7.57143	4.7	5	9.4	10.8	6.4	8.2	8.5
160	0	3	42.1	0.628809	1	62	163	99	13.5	12.5	41.9	119.134	10.6	4.59	1.13	0.86	3.44	11.05	#NULL!	172	72.2	24.4051	40.9	43.3	1.2	2.76087	1.625	7.5	#NULL!	#NULL!	0.934066	9.63333	6.8	13.3	9.1	8.8	9.3	10.5	#NULL!
161	40	3	42.15	0.332366	1	65	149	85	13	18	73.9	91.883	11.1	5.61	0.68	1.26	3.79	9.05	6.73	175	68.9	22.498	40.4	43.5	1.3	3.60839	2.13986	7.7	24.2523	2.70696	0.933333	7.47143	5.6	6	6.1	13.7	8.7	5.8	6.4
162	2	3	42.7	0.315006	1	48	125	85	30	19	88.7	88.6058	9.5	5.01	0.95	1.21	3.41	7.4	7.38	177	87.3	27.8656	42.4	43	1.25	2.78733	1.65611	8.9	37.8462	2.4272	0.912621	6.08571	5.9	7.5	5.1	4.7	7.4	4.7	7.3
163	2	3	43.4	0.530973	1	66	130	70	16	15	49.3	107.785	9.4	5.23	1.4	1.23	2.41	11.65	18	176	67.8	21.8879	43.5	43.3	1.14	2.92169	1.6988	7.4	44.1718	9.32	0.959596	8.32857	5.84	10.96	8.96	9.3	7.23	9.18	6.83
164	0	3	43.5	0.519704	1	33	142	98	25.7	17.9	38.02	151.489	11.2	8.18	9.97	0.97	2.46	15.81	42.14	170	81.2	28.0969	40.4	46.6	1.71	2.42105	1.45614	8.3	68.4647	29.6104	0.93617	6.37143	5.1	8.4	6.2	6.1	5.7	8.3	4.8
165	0	3	43.5	0.607988	1	47	120	80	30	13	68.1	108.064	10.5	4.61	1.07	1.01	2.46	7.34	3.9	165	67.6	24.8301	41.1	45.9	1.68	2.57143	1.51099	7.5	20.3125	1.27227	0.969072	7.51429	4.7	8.3	8.4	6.3	6.9	9.8	8.2
166	1	3	43.5	0.510744	2	48	120	70	19	9	37.2	121.595	10.8	4.75	0.94	1.39	2.56	13.18	3	158	60.5	24.2349	41.1	45.9	1.68	2.01036	1.15544	6.8	6.19835	1.75733	0.933333	8.08571	5.9	11.9	7.2	7.9	6.7	7.5	9.5
167	0	3	43.6	0.448826	1	44	142	109	143.2	165.7	73.7	107.014	10.7	5.85	1.7	0.83	5.11	8.78	13.17	175	106.5	34.7755	40.5	46.7	1.28	1.26039	0.754923	8.9	49.8864	5.13923	1.09009	6.87143	4.8	9.2	6.3	6.9	6.6	7.6	6.7
168	0	3	43.6	0.297477	1	61	130	70	19	17	77.1	93.1482	10.2	4.5	0.78	1.09	2.07	6.69	1.6	180	75.3	23.2407	41.2	46	1.56	4.12857	2.42857	8.2	10.0313	0.475733	0.926316	6.62857	5.9	8.6	5.5	6.4	6.3	6.5	7.2
169	0	3	43.85	0.607258	1	37	142	90	119	81	61.4	121.274	9.4	5.99	4.66	1.02	3.87	12.05	19.41	188	124	35.0837	43.6	44.1	1.3	1.22677	0.730483	8.9	45.4035	10.3951	1.05455	9.44286	6	13.3	11.7	11.6	5.6	9.2	8.7
150	16	3	39.55	0.406757	1	53	152	100	39	11	63.3	106.502	8.5	5.41	1.74	1.15	2.52	12.61	8.3	172	74	25.0135	36.1	43	1.32	2.32243	1.36449	7.4	18.2217	4.65169	0.885417	10.3443	7.12	12.23	10.15	12.07	8.03	12.31	10.5
154	2	3	41.15	0.573957	1	44	112	86	16	31	65.1	112.183	8.9	5.21	2.73	1.48	2.27	9.41	5.4	170	79.1	27.3702	41.1	41.2	1.12	2.96859	1.72775	8.5	18.2741	2.2584	0.980198	6.88333	6	5.3	9.6	7	7.6	5.8	#NULL!
172	0.5	3	44.25	0.373806	1	53	120	70	32	16	64.9	105.9	10.3	4.3	1.18	0.8	3.19	8.28	3.88	175	73.3	23.9347	43.2	45.3	1.2	3.01714	1.79429	7.7	16.2343	1.42784	0.886598	7.53333	5.3	9	7.8	7	4.9	11.2	#NULL!
173	11	3	45.7	0.433455	1	65	156	88	17	10	91	75.8716	9.6	3.88	0.95	1.09	1.67	9.12	9.1	175	81.9	26.7429	45	46.4	1.31	2.6729	1.56542	8.5	32.3843	3.68853	1.07216	8.1	7.8	9	8.2	5.2	6.6	9.7	10.2
174	0.25	3	46.4	0.274866	1	35	120	80	146	47	65.5	119.504	11.3	4.81	2.69	0.97	3.13	8.14	18.95	180	93.5	28.858	45.8	47	1.32	2.60887	1.57258	9.1	81.681	6.85569	0.942308	8.44286	7.3	13	10.4	6.8	6.4	8	7.2
175	1	3	46.45	0.54429	1	57	120	80	51	41	82.5	90.805	9.4	5.9	6.92	0.88	1.61	6.62	6.6	178	93.7	29.5733	46	46.9	1.31	2.26449	1.34058	9.5	42.3077	1.94187	1.01695	8.64286	6.5	10.9	4.2	9.8	8.2	11.6	9.3
176	24	3	47.2	0.410604	1	58	110	78	13.1	15.1	75	96.0457	11.6	6.23	1.74	1.63	3.49	14.9	2.31	182	81.1	24.4838	47.1	47.3	1.02	3.29282	1.91713	8.4	4.05263	1.52973	0.811321	7.14286	5.3	8.4	5	10.5	4.9	8.8	7.1
177	2	3	48.9	0.375367	1	49	116	80	9	9	59.4	112.826	11	5.36	1.39	1.15	2.49	12.38	3.6	180	68.2	21.0494	49.6	48.2	1.04	3.98473	2.33588	7.7	8.10811	1.9808	0.944444	7.49714	6.43	9.1	8.24	6.76	6.95	7.99	7.01
178	1	3	49	0.546599	1	37	120	80	41	18	68.2	115.928	10	6.24	2.68	1.16	3.46	7.26	4.4	180	79.4	24.5062	48.7	49.3	1.55	3.45029	2.06433	8.5	23.4043	1.41973	0.947917	7.65714	4.1	6.7	6.6	8	9.2	8.2	10.8
179	0	3	52	0.480477	1	32	117	93	22.2	19.9	71.9	117.598	13	5.59	0.69	1.46	4.05	7.11	#NULL!	183	92.2	27.5314	48.2	55.8	1.2	2.536	1.516	8.7	#NULL!	#NULL!	0.995951	5.8	6.1	6.1	5.4	5.4	7	4.6	6
180	24	3	53.35	0.429319	1	44	110	80	27	14	80.2	102.137	11.7	4.41	3.4	0.85	2.54	5.45	#NULL!	173	76.4	25.5271	51.3	55.4	1.3	3.64968	2.18471	8.3	#NULL!	#NULL!	0.876289	9	7	8.1	4.9	8.5	9	15	10.5
